# Supplementary material
Source: HighWire-hosted journal article supplement (https://erj.ersjournals.com/content/suppl/2012/10/05/40.4.949)
Supplement: After-death_questionnaire_eolicstudy.pdf [file After-death_questionnaire_eolicstudy.pdf]

**Vragenlijst specialist/huisarts na overlijden patiënt.**

Centrum .....

**Opmerking vooraf: één antwoord mogelijk per vraag, tenzij anders vermeld.**

## Algemeen

- Hoe vaak had u (gemiddeld geschat) **contact** (consultaties, huisbezoeken, **excl.** telefonisch contact) met patiënt?  
**laatste week vóór overlijden**                      **2de t/m 4de week vóór overlijden**                      **2de en 3de maand vóór overlijden**  
...x per week                                              ...x per week                                              ...x per maand
- Hoeveel dagen verbleef de patiënt in de laatste week voor overlijden in de setting waar u werkzaam bent?  
 \_\_\_\_\_ dagen op zeven  
 verbleef in de laatste week nooit in de setting waar ik werkzaam ben

## Functionele status patiënt tijdens de laatste week vóór overlijden.

- Wat was de functionele status van de patiënt?

|   |                                                                                                                                                                                         |
|---|-----------------------------------------------------------------------------------------------------------------------------------------------------------------------------------------|
| 0 | Volledig actief, alle normale bezigheden kunnen uitvoeren zonder beperkingen, zoals vóór het optreden van de ziekte.                                                                    |
| 1 | Beperkt in het verrichten van zware fysieke activiteiten, maar ambulante en in staat om lichte werkzaamheden of werk al zittend te verrichten, vb. licht huishoudelijk werk, bureauwerk |
| 2 | Ambulant en in staat om zichzelf volledig te verzorgen, maar niet in staat om enig ander werk te verrichten. Voor meer dan 50% van de dag uit bed.                                      |
| 3 | Slechts gedeeltelijk in staat zichzelf te verzorgen, voor meer dan 50% van de dag in bed of stoel                                                                                       |
| 4 | Volledig geïnvalideerd. Niet in staat zichzelf te verzorgen. Volledig bedlegerig of aan de stoel gekluisterd                                                                            |

## Overlijden patiënt

- Zou u willen aangeven op een schaal van 0 tot 10 hoe u het overlijden van de patiënt beoordeelt?

Onzachte dood    

|   |   |   |   |   |   |   |   |   |   |    |
|---|---|---|---|---|---|---|---|---|---|----|
| 0 | 1 | 2 | 3 | 4 | 5 | 6 | 7 | 8 | 9 | 10 |
|---|---|---|---|---|---|---|---|---|---|----|

    Zachte dood

- Was het overlijden plotseling en geheel onverwacht?

- 
- ja
- 
- 
- nee

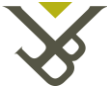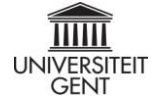

### Wens/verzoek van de patiënt

6. Heeft de patiënt, voor zover u weet, ooit een wens geuit tot het voorschrijven, verstrekken of toedienen van een geneesmiddel met het expliciete doel het levenseinde te bespoedigen, het leven in te korten of te beëindigen of de patiënt in staat te stellen zijn eigen leven te beëindigen?
- nee, de patiënt had geen wens kenbaar gemaakt ⇒ ga naar vraag 8
  - ja, de patiënt had wens geuit tot toedienen van een geneesmiddel door arts met het expliciete doel het levenseinde te bespoedigen, het leven in te korten of te beëindigen [*euthanasie*] ⇒ ga naar vraag 7
  - ja, de patiënt had wens geuit tot voorschrijven of verstrekken van een geneesmiddel om zelf het leven te beëindigen [*hulp bij zelfdoding*] ⇒ ga naar vraag 7
7. In welke mate was er sprake van een uitdrukkelijk en herhaald verzoek toen de wens voor het laatst besproken werd?
- in zeer sterke mate
  - in sterke mate
  - in mindere mate
  - weet niet

Ruimte voor toelichting: \_\_\_\_\_

\_\_\_\_\_

### Medische beslissingen met een potentieel levensverkortend effect

8. Heeft u of een collega arts in het ziekenhuis één of meerdere van de volgende handelingen uitgevoerd (of doen uitvoeren), wetende dat deze handelswijze het levenseinde van de patiënt kon bespoedigen?

**(gelieve zowel vragen 8a en 8b te beantwoorden)**

- a. Niet opstarten of stopzetten van een behandeling\*?
- ja
  - nee
- b. Het intensiveren van de pijn- en/of symptoombestrijding door gebruik van een geneesmiddel?
- ja ⇒ ga naar vraag 9
  - nee ⇒ ga naar vraag 10

\*In dit onderzoek omvat 'behandeling' ook kunstmatige voeding en/of hydratatie.

9. Was het bespoedigen van het levenseinde mede het doel van de handelswijze zoals beschreven in vraag 8b?
- ja
  - nee

10. Was het overlijden het gevolg van één of meerdere van de volgende handelswijzen die u of een collega arts in het ziekenhuis beslisten uit te voeren met het expliciete doel het levenseinde te bespoedigen\*?

- a. Niet opstarten of stopzetten van een behandeling\*\*?
- ja
  - nee

\* 'het levenseinde te bespoedigen' *of* 'het leven niet te verlengen'.

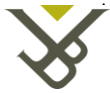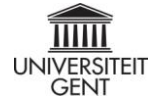

11. Was het overlijden het gevolg van het gebruik van een geneesmiddel dat werd voorgeschreven, verstrekt of toegediend door u of een collega arts in het ziekenhuis met het expliciete doel het levenseinde te bespoedigen (of de patiënt in staat te stellen zelf zijn of haar leven te beëindigen)?

a.

- ja
- nee

b. Zo ja, wie diende dit middel toe (=bracht het in het lichaam)?

**(kruis zoveel antwoorden aan als toepasselijk)**

- de patiënt
- uzelf of een andere arts
- verpleegkundig personeel
- iemand anders

Andere.

12. Werd de patiënt tot aan het overlijden vrijwel doorlopend in slaap gehouden d.m.v. hoge dosering sedaties (b.v. benzodiazepines of barbituraten)?

- ja, en kunstmatige voeding en hydratatie werden niet toegediend
- ja, en kunstmatige voeding en hydratatie werden toegediend
- nee
